# Supplementary material for: Higher ETV5 Expression Associates With Poor 5-Florouracil-Based Adjuvant Therapy Response in Colon Cancer
Source: Frontiers journal article supplement (doi:10.3389/fphar.2020.620811), 2021-02-09
Supplement: Data_Sheet_1.pdf [file Data_Sheet_1.pdf]

Suppl. Table 1: Clinical characteristic of studied patients

|                               | CIT cohort<br>(GSE39582) |                    | MCC cohort<br>(GSE17536) | Metastatic cohort<br>(GSE72970) |                   | GSE1433         | GSE1433           |
|-------------------------------|--------------------------|--------------------|--------------------------|---------------------------------|-------------------|-----------------|-------------------|
| Traits                        | Treated<br>(210)         | Untreated<br>(262) | Treated<br>(56)          | Treated<br>(64)                 | Untreated<br>(21) | Treated<br>(61) | Untreated<br>(86) |
| Sex (M/F)                     | 116/94                   | 113/149            | 30/26                    | 26/37                           | 10/11             | 31/30           | 42/44             |
| Location<br>(Distal/proximal) | 137/73                   | 142/120            | -                        | 43/20                           | 9/12              | 26/35           | 40/46             |
| Stage (II/III/IV)             | 58/152/0                 | 205/57/0           | 0/56/0                   | 0/0/64                          | 0/0/21            | 13/48/0         | 63/23/0           |

Suppl. Table 2: Correlation analysis between ETV5 and oncotype DX recurrence score in the studied cohorts

| Dataset  | Correlation(r) | P                      |
|----------|----------------|------------------------|
| GSE39582 | 0.45           | $6.28 \times 10^{-12}$ |
| GSE17536 | 0.52           | $3.91 \times 10^{-5}$  |
| GSE72970 | 0.27           | 0.03                   |
| GSE14333 | 0.49           | $7.44 \times 10^{-5}$  |

The Pearson correlation coefficients (r) and respective p values (p) have been shown in the table.

Suppl. Table 3: Correlation analysis between ETV5 and cell proliferation markers (MK167, MYC and MYBL2) in the adjCTX treated samples from studied cohorts

|          | Gene | MKI67        | MYC                            | MYBL2                           |
|----------|------|--------------|--------------------------------|---------------------------------|
| GSE14333 | ETV5 | -0.32 (0.01) | -0.32 (0.02)                   | -0.42 ( $7.87 \times 10^{-4}$ ) |
| GSE72970 | ETV5 | -0.03 (0.79) | -0.33(0.01)                    | -0.25(0.05)                     |
| GSE39582 | ETV5 | 0.06(0.40)   | -0.18 ( $9.3 \times 10^{-3}$ ) | -0.08 (0.27)                    |
| GSE17536 | ETV5 | -0.27 (0.05) | -0.37( $4.92 \times 10^{-3}$ ) | -0.34 (0.01)                    |

The Pearson correlation coefficients (r) and respective p values (p) have been shown in the table in the parenthesis.

Suppl. Figure 1: Effect of ETV5 expression over stage III colon cancer patients in different cohort

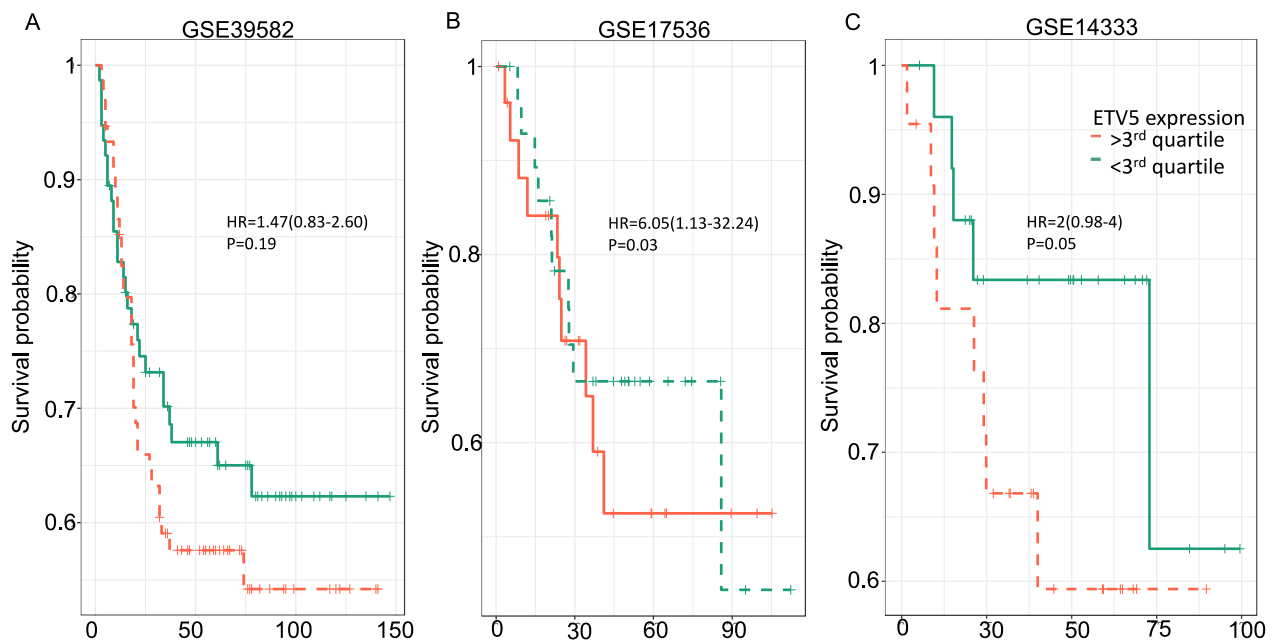

Effect of ETV5 expression over RFS in 5-FU-based adjCTXtreated stage III colon cancer patients. For visualization purpose, patients with the ETV5 expression  $> 3^{\text{rd}}$  quartile has been categorized as high (red) and with expression  $< 1^{\text{st}}$  quartile has been categorized as low (low). However, the hazard ratio and p-value have been calculated using cox-regression for the all samples together (without categorization) and has been shown in the figure.
